# Supplementary material
Source: PubMed Central journal article supplement (PMC5885260)
Supplement: jamaoncol-4-529-s002.pdf [file jamaoncol-4-529-s002.pdf]

## Supplementary Online Content

Cremolini C, Antoniotti C, Lonardi S, et al. Activity and safety of cetuximab plus modified FOLFOXIRI followed by maintenance with cetuximab or bevacizumab for *RAS* and *BRAF* wild-type metastatic colorectal cancer: a randomized phase 2 clinical trial. *JAMA Oncol*. Published online February 15, 2018. 10.1001/jamaoncol.2017.5314

**eAppendix.** Participating Centers and Principal Investigators

**eTable 1.** Main Demographic and Clinical Characteristics of Patients in the mITT

Population

**eTable 2.** Activity Results in the mITT Population

**eTable 3.** Grade  $\geq 3$  Adverse Events Occurring in at Least 3% of Patients During Induction and Maintenance

**eTable 4.** Treatments After Progression According to Randomization Arm

**eFigure.** Distribution of Deepness of Response in the mITT Population, According to Treatment Arm

This supplementary material has been provided by the authors to give readers additional information about their work.

**eAppendix. Participating Centers and Principal Investigators**

| <b>Principal Investigator</b> | <b>Site Name</b>                                                     | <b>City</b>      |
|-------------------------------|----------------------------------------------------------------------|------------------|
| Alfredo Falcone               | Polo Oncologico – Ospedale Santa Chiara                              | Pisa             |
| Manuela Rossi                 | A.O.SS. Antonio e Biagio e Cesare Arrigo                             | Alessandria      |
| Sergio Frustaci               | Centro di Riferimento Oncologico IRCCS                               | Aviano           |
| Carmine Pinto                 | Ospedale Sant’Orsola                                                 | Bologna          |
| Alberto Zaniboni              | Fondazione Poliambulanza                                             | Brescia          |
| Francesca Valcamonico         | ASST degli Spedali Civili                                            | Brescia          |
| Cristina Granetto             | Ospedale Santa Croce e Carle                                         | Cuneo            |
| Teresa Gamucci                | Ospedale F. Spaziani                                                 | Frosinone        |
| Silvana Chiara                | Ospedale San Martino IRCCS                                           | Genova           |
| Luca Gianni                   | Ospedale San Raffaele IRCCS                                          | Milano           |
| Sara Lonardi                  | Istituto Oncologico Veneto IRCCS                                     | Padova           |
| Giacomo Allegrini             | Ospedale “Felice Lotti”                                              | Pontedera        |
| Corrado Boni                  | Arcispedale Santa Maria Nuova IRCSS                                  | Reggio Emilia    |
| Ida Pavese                    | Ospedale San Pietro Fatebenefratelli                                 | Roma             |
| Domenico Corsi                | Ospedale San Giovanni Calibita Fatebenefratelli                      | Roma             |
| Enrico Cortesi                | Policlinico Umberto I                                                | Roma             |
| Giuseppe Tonini               | Università Campus Biomedico                                          | Roma             |
| Alessandro Bertolini          | Ospedale di Sondrio                                                  | Sondrio          |
| Libero Ciuffreda              | Azienda Ospedaliero–Universitaria Città della Salute e della Scienza | Torino           |
| Giuseppe Aprile               | Ospedale Santa Maria della Misericordia                              | Udine            |
| Domenico Amoroso              | Ospedale Versilia                                                    | Lido di Camaiore |

**eTable 1.** Main Demographic and Clinical Characteristics of Patients in the mITT

## Population

| Characteristic              | Arm A<br>(n= 59) | Arm B<br>(n= 57) | Overall mITT<br>(n= 116) |
|-----------------------------|------------------|------------------|--------------------------|
| Age (years)                 | 61 (52-67)       | 59 (53-67)       | 59.5 (53-67)             |
| Sex                         |                  |                  |                          |
| Male                        | 40 (68%)         | 42 (74%)         | 82 (71%)                 |
| Female                      | 19 (32%)         | 15 (26%)         | 34 (29%)                 |
| ECOG PS                     |                  |                  |                          |
| 0                           | 53 (90%)         | 50 (88%)         | 103 (89%)                |
| 1-2                         | 6 (10%)          | 7 (12%)          | 13 (11%)                 |
| Synchronous Metastases      |                  |                  |                          |
| Yes                         | 51 (86%)         | 47 (82%)         | 98 (84%)                 |
| No                          | 8 (14%)          | 10 (18%)         | 18 (16%)                 |
| Prior Adjuvant chemotherapy |                  |                  |                          |
| Yes                         | 6 (10%)          | 8 (14%)          | 14 (12%)                 |
| No                          | 53 (90%)         | 49 (86%)         | 102 (88%)                |
| Primary Tumor Site          |                  |                  |                          |
| Right                       | 14 (24%)         | 7 (12%)          | 21 (18%)                 |
| Left                        | 30 (51%)         | 35 (62%)         | 65 (56%)                 |
| Rectum                      | 15 (25%)         | 15 (26%)         | 30 (26%)                 |
| Number of Metastatic Sites  |                  |                  |                          |
| 1                           | 33 (56%)         | 29 (51%)         | 62 (53%)                 |
| >1                          | 26 (44%)         | 28 (49%)         | 54 (47%)                 |
| Liver Only Disease          |                  |                  |                          |
| Yes                         | 28 (47%)         | 24 (42%)         | 52 (45%)                 |
| No                          | 31 (53%)         | 33 (58%)         | 64 (55%)                 |
| Resected Primary Tumor      |                  |                  |                          |
| Yes                         | 35 (59%)         | 33 (58%)         | 68 (59%)                 |
| No                          | 24 (41%)         | 24 (42%)         | 48 (41%)                 |

Data are median (IQR) or number (%). ECOG PS, Eastern Cooperative Oncology Group Performance Status. Arm A indicates mFOLFOXIRI plus cetuximab, followed by maintenance with cetuximab. Arm B indicates mFOLFOXIRI plus cetuximab, followed by maintenance with bevacizumab.

**eTable 2.** Activity Results in the mITT Population

|                                 | Treatment arm              |                            | Overall population<br>n= 116<br>No (%) |
|---------------------------------|----------------------------|----------------------------|----------------------------------------|
|                                 | Arm A<br>(n= 59)<br>No (%) | Arm B<br>(n= 57)<br>No (%) |                                        |
| Complete response               | 3 (5%)                     | 2 (3%)                     | 5 (4%)                                 |
| Partial response                | 37 (63%)                   | 41 (72%)                   | 78 (68%)                               |
| Stable disease                  | 14 (24%)                   | 8 (14%)                    | 22 (19%)                               |
| Progressive disease             | 2 (3%)                     | 2 (4%)                     | 4 (3%)                                 |
| Not evaluated                   | 3 (5%)                     | 4 (7%)                     | 7 (6%)                                 |
| <b>Objective Response Rate</b>  | 40 (68%)                   | 43 (75%)                   | 83 (72%)                               |
| <b>Disease Control Rate</b>     | 54 (92%)                   | 51 (89%)                   | 105 (91%)                              |
|                                 | Arm A<br>(n= 54)<br>No (%) | Arm B<br>(n= 53)<br>No (%) | Overall<br>(n=107)<br>No (%)           |
| Early Objective Response Rate   | 40 (74%)                   | 41 (77%)                   | 81 (76%)                               |
| Depth of Response, median (IQR) | 49.1% (30.7%–67.9%)        | 55.7% (41.5%–67.6%)        | 53.2% (37.1%–67.6%)                    |

Data are median (IQR) or number (%). Some percentages do not add up to 100 because of rounding. Arm A indicates mFOLFOXIRI plus cetuximab, followed by maintenance with cetuximab. Arm B indicates mFOLFOXIRI plus cetuximab, followed by maintenance with bevacizumab.

**eTable 3.** Grade  $\geq 3$  Adverse Events Occurring in at Least 3% of Patients During Induction and Maintenance

| <b>Safety results during induction</b>   |                          |                          |                                             |
|------------------------------------------|--------------------------|--------------------------|---------------------------------------------|
| <b>AEs, No (%)</b>                       | <b>Arm A<br/>(n= 59)</b> | <b>Arm B<br/>(n= 57)</b> | <b>Overall mITT<br/>n= 116</b>              |
| Vomit                                    | 2 (3%)                   | 1 (2%)                   | 3 (3%)                                      |
| Diarrhea                                 | 12 (20%)                 | 9 (16%)                  | 21 (18%)                                    |
| Stomatitis                               | 4 (7%)                   | 3 (5%)                   | 7 (6%)                                      |
| Neutropenia                              | 17 (29%)                 | 19 (33%)                 | 36 (31%)                                    |
| Febrile neutropenia                      | 2 (3%)                   | 1 (2%)                   | 3 (3%)                                      |
| Neurotoxicity                            | 4 (7%)                   | 0                        | 4 (3%)                                      |
| Skin toxicity                            | 11 (19%)                 | 7 (12%)                  | 18 (16%)                                    |
| Asthenia                                 | 6 (10%)                  | 5 (9%)                   | 11 (9%)                                     |
| Anorexia                                 | 3 (5%)                   | 1 (2%)                   | 4 (3%)                                      |
| Venous thromboembolism                   | 1 (2%)                   | 2 (3%)                   | 3 (3%)                                      |
| <b>Safety results during maintenance</b> |                          |                          |                                             |
| <b>AEs, No (%)</b>                       | <b>Arm A<br/>(n= 40)</b> | <b>Arm B<br/>(n= 38)</b> | <b>Maintenance<br/>population<br/>n= 78</b> |
| Hand-foot syndrome                       | 2 (5%)                   | 0                        | 2 (3%)                                      |
| Skin toxicity                            | 8 (20%)                  | 1 (3%)                   | 9 (12%)                                     |
| Hypertension                             | 0                        | 2 (5%)                   | 2 (3%)                                      |

Data are number (%). AEs: adverse events. Arm A indicates mFOLFOXIRI plus cetuximab, followed by maintenance with cetuximab. Arm B indicates mFOLFOXIRI plus cetuximab, followed by maintenance with bevacizumab.

**eTable 4.** Treatments After Progression According to Randomization Arm

|                                    | Treatment arm              |                            | Overall mITT<br>n= 116<br>No (%) |
|------------------------------------|----------------------------|----------------------------|----------------------------------|
|                                    | Arm A<br>(n= 59)<br>No (%) | Arm B<br>(n= 57)<br>No (%) |                                  |
| Alive after disease progression    | 53 (90%)                   | 54 (95%)                   | 107 (92%)                        |
| Any 2 <sup>nd</sup> line therapy   | 43 (81%)                   | 42 (78%)                   | 85 (79%)                         |
| <b>2<sup>nd</sup> line therapy</b> | <b>n= 43</b>               | <b>n= 42</b>               | <b>n= 85</b>                     |
| mFOLFOXIRI plus cet                | 19 (44%)                   | 28 (67%)                   | 47 (55%)                         |
| FOLFOX/FOLFIRI plus cet            | 6 (14%)                    | 7 (17%)                    | 13 (15%)                         |
| FOLFOXIRI plus pan                 | 2 (5%)                     | 0                          | 2 (2%)                           |
| cet or pan monotherapy             | 0                          | 2 (5%)                     | 2 (2%)                           |
| FOLFOXIRI plus bev                 | 2 (5%)                     | 0                          | 2 (2%)                           |
| FOLFOX/FOLFIRI/XELOX plus bev      | 9 (21%)                    | 2 (5%)                     | 11 (13%)                         |
| capecitabine plus bev              | 2 (5%)                     | 1 (2%)                     | 3 (4%)                           |
| FOLFOX/FOLFIRI                     | 3 (7%)                     | 0                          | 3 (4%)                           |
| Other                              | 0                          | 2 (5%)                     | 2 (2%)                           |

Data are number (%). Some percentages do not add up to 100 because of rounding. Cet: cetuximab; mFOLFOXIRI: modified fluorouracil, leucovorin, oxaliplatin and irinotecan; FOLFOX: fluorouracil, leucovorin, and oxaliplatin; FOLFIRI: fluorouracil, leucovorin, and irinotecan; bev: bevacizumab; pan: panitumumab; FOLFOXIRI: fluorouracil, leucovorin, oxaliplatin and irinotecan; XELOX: capecitabine and oxaliplatin. Arm A indicates mFOLFOXIRI plus cetuximab, followed by maintenance with cetuximab. Arm B indicates mFOLFOXIRI plus cetuximab, followed by maintenance with bevacizumab.

**eFigure.** Distribution of Deepness of Response in the mITT Population, According to Treatment Arm

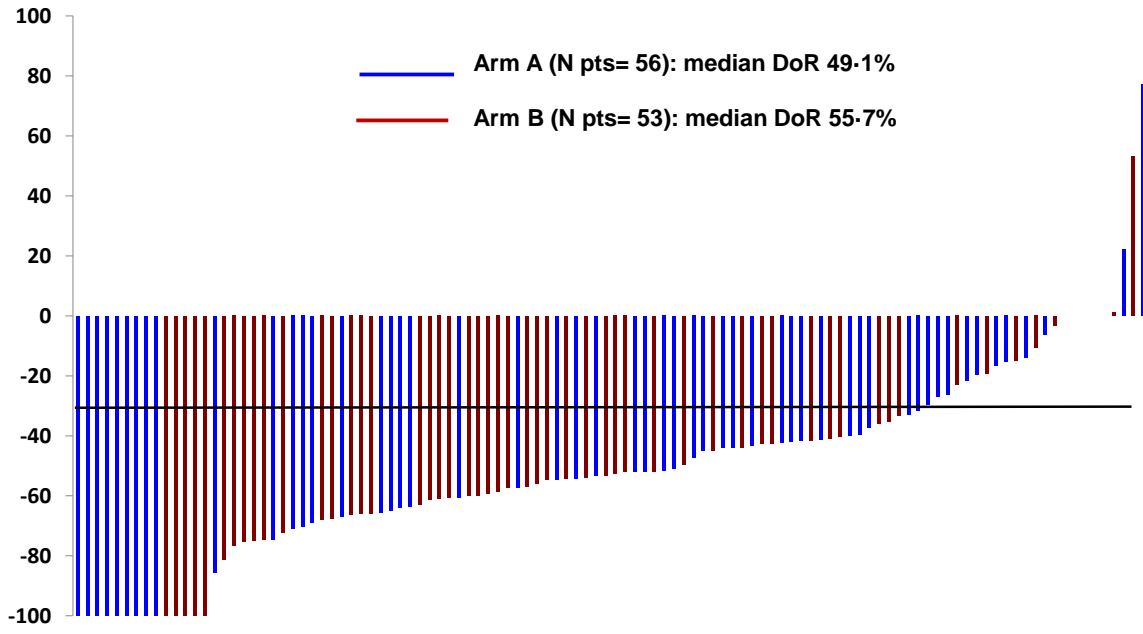

DoR, depth of response; mos, months. Arm A indicates mFOLFOXIRI plus cetuximab, followed by maintenance with cetuximab. Arm B indicates mFOLFOXIRI plus cetuximab, followed by maintenance with bevacizumab.
